# Supplementary material
Source: Atypon-hosted journal article supplement (doi:10.1287/serv.2025.0067)
Supplement: serv.2025.0067.sm1.pdf [file serv.2025.0067.sm1.pdf]

# Shall You Get an Invasive Examination? An AI-Driven Risk Stratification Model for Individuals with Suboptimal Health Status

## Online Appendix

### 1. Tables

**Table A1. Feature Selection Results: Full Feature Set vs. Stepwise Logistic Regression**

| Model                                       | Accuracy     | Precision    | F1-score    | Sensitivity  | Specificity  | AUC         |
|---------------------------------------------|--------------|--------------|-------------|--------------|--------------|-------------|
| Full features                               | 0.708        | 0.320        | 0.322       | 0.325        | 0.812        | 0.63        |
| <b>Stepwise<br/>Logistic<br/>Regression</b> | <b>0.632</b> | <b>0.297</b> | <b>0.38</b> | <b>0.528</b> | <b>0.660</b> | <b>0.64</b> |

**Table A2. All Features**

| Features                         | Standard Reference Ranges        |                   |
|----------------------------------|----------------------------------|-------------------|
| Age                              | 52.2±11.2                        |                   |
| Sex                              | F/M                              |                   |
| Body Mass Index (BMI)            | 18.5-23.9                        | Kg/m <sup>2</sup> |
| Hypertension                     | Systolic ≥ 140 or Diastolic ≥ 90 | mmHg              |
| Alanine Transaminase (ALT)       | 0-36                             | U/L               |
| Aspartate Aminotransferase (AST) | 0-34                             | U/L               |
| Total Bilirubin                  | 0.1-1.2                          | mg/dL             |
| Platelets Count                  | 150-400                          | 1000/uL           |
| Calcium (Ca)                     | 7.9-9.9                          | mg/dL             |
| Triglyceride                     | <150                             | mg/dL             |
| Total Cholesterol                | <200                             | mg/dL             |
| High-Density Lipoprotein (HDL)   | M:>40,F:>50                      | mg/dL             |
| Low-Density Lipoprotein (LDL)    | <100                             | mg/dL             |
| Diastolic Blood Pressure         | < 80                             | mmHg              |
| Systolic Blood Pressure          | < 120                            | mmHg              |
| Waist Circumference              | M:<90 F:<80                      | cm                |
| Blood Urea Nitrogen (BUN)        | 6-21                             | mg/dL             |
| Creatinine                       | M:0.4-1.4,F:0.6-1.2              | mg/dL             |
| Sodium (Na)                      | 135-145                          | mmol/L            |

|                                             |                                                                                       |         |
|---------------------------------------------|---------------------------------------------------------------------------------------|---------|
| Potassium (K)                               | 3.5-5.1                                                                               | mmol/L  |
| White Blood Cells (WBC)                     | M:3.9-10.6,F:3.5-11                                                                   | 1000/uL |
| Hemoglobin (Hb)                             | M:13.5-17.5,F:12-16                                                                   | g/dL    |
| Mean Corpuscular Volume (MCV)               | 80-100                                                                                | fL      |
| Neutrophils                                 | 42-74                                                                                 | %       |
| Lymphocytes                                 | 20-56                                                                                 | %       |
| C-Reactive Protein (CRP)                    | <5                                                                                    | mg/L    |
| Monocytes                                   | 0-12                                                                                  | %       |
| Albumin                                     | 3.5-5.5                                                                               | g/dL    |
| Fasting Glucose (AC)                        | 70-105                                                                                | mg/dL   |
| Postprandial Glucose (PC)                   | <200                                                                                  | mg/dL   |
| Waist Circumference                         | M:≤90,F:≤80                                                                           | CM      |
| Uric Acid                                   | <8                                                                                    | mg/dL   |
| Fatty Liver Score                           | Mild/Moderate/Severe                                                                  |         |
| Dental Caries Count                         | <32                                                                                   |         |
| Tooth Missing Count                         | <32                                                                                   |         |
| Periodontitis                               | Absent/Present                                                                        |         |
| Gallstones                                  | Absent/Present                                                                        |         |
| Dental Calculus                             | Absent/Present                                                                        |         |
| Gallbladder Polyps                          | Absent/Present                                                                        |         |
| Tea usage                                   | Absent/Present                                                                        |         |
| Coffee usage                                | Absent/Present                                                                        |         |
| Areca usage                                 | Absent/Present                                                                        |         |
| Alcohol usage                               | Absent/Present                                                                        |         |
| Systemic Immune-Inflammation Index (SII)    | $\frac{\text{Platelets} \times \text{Neutrophil}}{\text{Lymphocyte}}$                 |         |
| Systemic Inflammation Response Index (SIRI) | $\frac{\text{Monocyte} \times \text{Neutrophil}}{\text{Lymphocyte}}$                  |         |
| International Prognosis Index (IPI)         | $\frac{\text{CRP} \times \text{Neutrophil}}{\text{Lymphocyte} \times \text{Albumin}}$ |         |
| Neutrophil-to-Lymphocyte Ratio (NLR)        | $\frac{\text{Neutrophil}}{\text{Lymphocyte}}$                                         |         |
| Lymphocyte-to-Monocyte Ratio (LMR)          | $\frac{\text{Lymphocyte}}{\text{Monocyte}}$                                           |         |
| Atherogenic Index of Plasma (AIP)           | $\text{Triglyceride} \times \text{HDL\_C}$                                            |         |
| Triglyceride-Glucose Index (TyG)            | $\ln (\text{Triglyceride} \times \text{Fasting Glucose})$                             |         |

|                                                     |                                                                                  |
|-----------------------------------------------------|----------------------------------------------------------------------------------|
| C-reactive protein-triglyceride-glucose index (CTI) | $0.412 \times \ln(\text{CRP}) + \text{TyG}$                                      |
| Fibrosis-4 (FIB-4)                                  | $\frac{\text{Age} \times \text{AST}}{\text{Platelets} \times \sqrt{\text{ALT}}}$ |
| Adenomatous                                         | Absent/Present                                                                   |

**Table A3 Logistic Regression Regularization Parameter ( $\alpha$ ) Selection for the Proposed Method**

| Model                          | Accuracy                             | Precision                            | Recall                               | F1-score                              | Specificity                          | AUC         |
|--------------------------------|--------------------------------------|--------------------------------------|--------------------------------------|---------------------------------------|--------------------------------------|-------------|
| $\alpha=0.05$                  | 0.638<br>[0.631,0.645]               | 0.766<br>[0.748,0.783]               | 0.597<br>[0.572,0.622]               | 0.669<br>[0.658,0.681]                | 0.704<br>[0.666,0.741]               | 0.71        |
| $\alpha=0.10$                  | 0.639<br>[0.626,0.652]               | 0.763<br>[0.751,0.775]               | 0.599<br>[0.576,0.623]               | 0.671<br>[0.655,0.686]                | 0.702<br>[0.682,0.723]               | 0.72        |
| <b><math>\alpha=0.2</math></b> | <b>0.685</b><br><b>[0.673,0.696]</b> | <b>0.731</b><br><b>[0.716,0.745]</b> | <b>0.776</b><br><b>[0.751,0.800]</b> | <b>0.751</b><br><b>[0.7042,0.761]</b> | <b>0.539</b><br><b>[0.492,0.586]</b> | <b>0.72</b> |

**Table A4: Stepwise Logistic Regression Results ( $\alpha = 0.2$ )**

|                                  | Cofe.   | std err | z      | P >  z | [0.025 | 0.975] |
|----------------------------------|---------|---------|--------|--------|--------|--------|
| const                            | -7.2557 | 0.777   | -9.342 | 0.000  | -8.778 | -5.733 |
| Age                              | 0.0777  | 0.004   | 19.276 | 0.000  | 0.070  | 0.086  |
| Gender                           | 0.6699  | 0.081   | 8.302  | 0.000  | 0.512  | 0.828  |
| Triglyceride                     | 0.2896  | 0.075   | 3.843  | 0.000  | 0.142  | 0.437  |
| Postprandial<br>Glucose (PC)     | -0.083  | 0.001   | -6.981 | 0.000  | -0.011 | -0.006 |
| Fasting glucose                  | 0.0105  | 0.002   | 4.420  | 0.000  | 0.006  | 0.015  |
| Waist<br>Circumference           | 0.0131  | 0.005   | 2.811  | 0.005  | 0.004  | 0.022  |
| Potassium (K)                    | -0.3077 | 0.098   | -3.135 | 0.002  | -0.500 | -0.115 |
| White Blood Cells<br>(WBC)       | 0.0568  | 0.023   | 2.424  | 0.015  | 0.011  | 0.103  |
| Smoking                          | 0.3486  | 0.108   | 3.228  | 0.001  | 0.137  | 0.560  |
| Areca                            | -0.5290 | 0.182   | -2.912 | 0.004  | -0.885 | -0.173 |
| Hypertension                     | 0.2356  | 0.115   | 2.040  | 0.041  | 0.009  | 0.462  |
| Alanine<br>Transaminase<br>(ALT) | 0.0034  | 0.002   | 1.876  | 0.061  | -0.000 | 0.007  |

|             |        |       |       |       |        |       |
|-------------|--------|-------|-------|-------|--------|-------|
| Gallbladder | 0.1647 | 0.088 | 1.864 | 0.062 | -0.008 | 0.338 |
| Polyps      |        |       |       |       |        |       |

## 2. Figures

### Cohort Construction and Data Partitioning

Figure A1 illustrates the sequential inclusion and exclusion process applied to the initial annual health checkup cohort (N = 49,522). Patients were excluded stepwise if they (1) did not meet fatty liver diagnostic criteria, (2) did not satisfy MASLD definition, (3) had incomplete clinical, biochemical, or lifestyle variables required for model construction, or (4) had inadequate bowel preparation that could compromise colonoscopy-based adenoma labeling.

Importantly, patients with inadequate bowel preparation during colonoscopy were excluded to ensure reliable outcome labeling. Suboptimal bowel preparation may impair mucosal visualization and increase the risk of missed adenomas, introducing potential outcome misclassification. Exclusion of patients with inadequate bowel preparation was performed to reduce outcome misclassification. Poor bowel preparation is known to increase the risk of missed adenomas, thereby introducing label noise into negative classifications.

Absolute sample counts remaining after each exclusion step are reported to ensure transparency. The final analytic cohort comprised 3,971 patients (Adenoma: 2,443 [61.5%]; Non-adenoma: 1,528 [38.5%]). The dataset was subsequently evaluated using stratified 10-fold cross-validation, preserving class proportions across folds. The final analytic cohort (N = 3,971) was partitioned into ten approximately equal folds ( $\approx 397$  samples per fold), maintaining the overall adenoma prevalence of 61.5% within each fold. In each iteration: Eight folds were used for training ( $\approx 3,176$  samples), One fold was used for validation ( $\approx 397$  samples), One fold was used for testing ( $\approx 397$  samples).

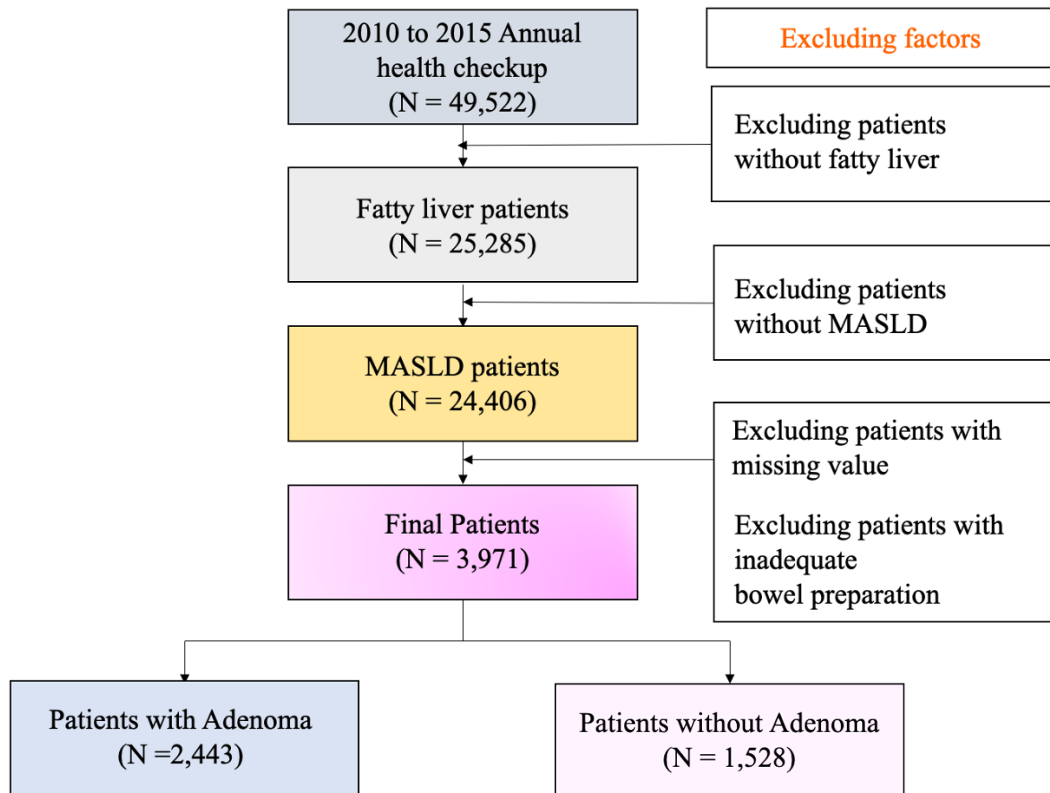

**Figure A1 Overview of the Data Collection Process**

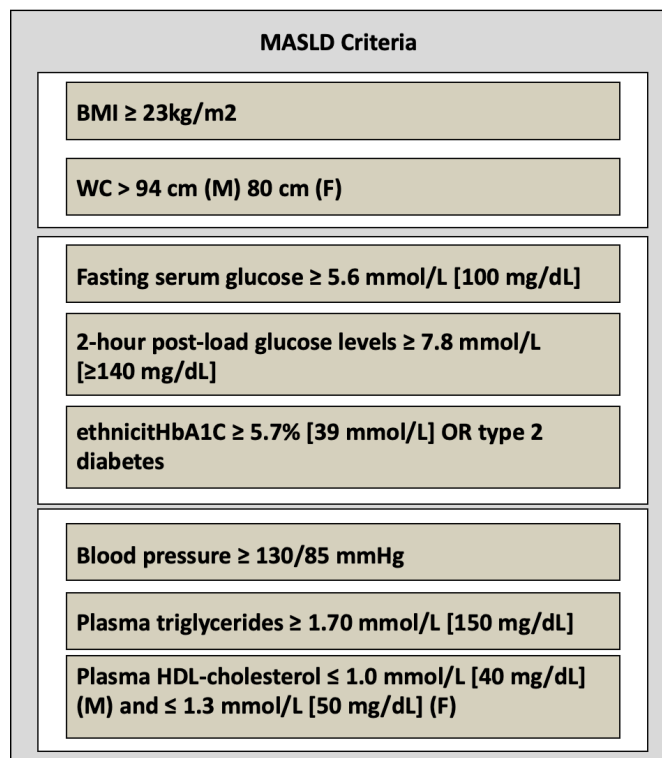

**Figure A2 Diagnostic Criteria for MASLD**

## Model Convergence and Early Stopping Strategy

Figure A3 illustrates the training and validation loss curves for CNN, Transformer, XGBoost, LSTM, LSTM with Attention, and our proposed guided attention model. The loss curves provide a visual assessment of model convergence and generalization. In general, stable learning is indicated when both training and validation losses decrease smoothly and remain close to each other. In contrast, overfitting is suggested when the training loss continues to decline but the validation loss plateaus or increases. As shown in Figure A3, XGBoost exhibits a clear overfitting tendency. Its training loss decreases rapidly and approaches a very low level, while the validation loss begins to increase after the early iterations. This widening gap between training and validation loss suggests that the model increasingly fits the training data but does not generalize equally well to unseen validation data. The Transformer model also shows unstable validation loss fluctuations, indicating less stable convergence. In contrast, the LSTM-based models show smoother convergence patterns. The proposed guided attention model demonstrates a relatively small gap between training and validation loss, indicating stable learning and improved generalization. Early stopping was applied based on validation loss to reduce overfitting and prevent unnecessary training beyond the point of best validation performance.

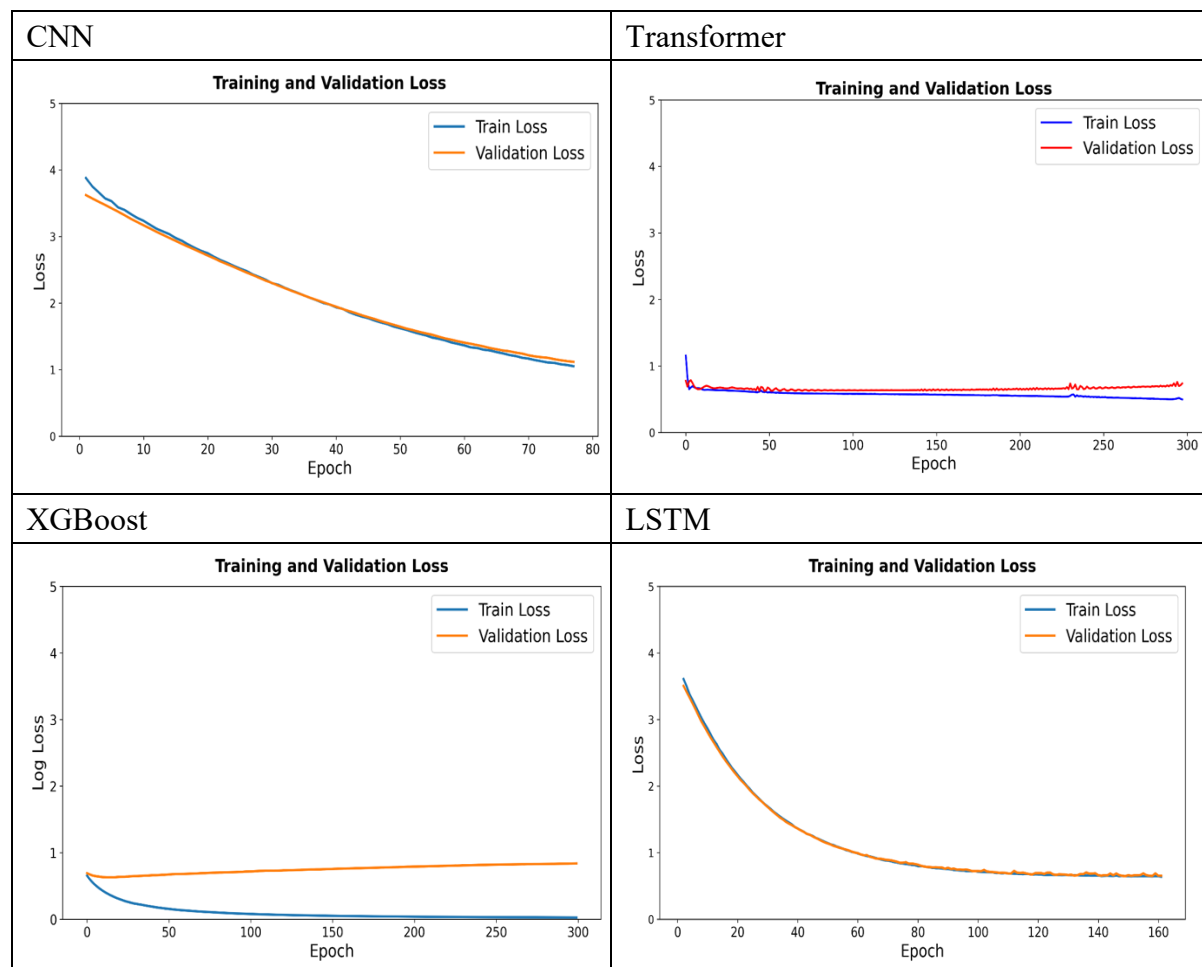

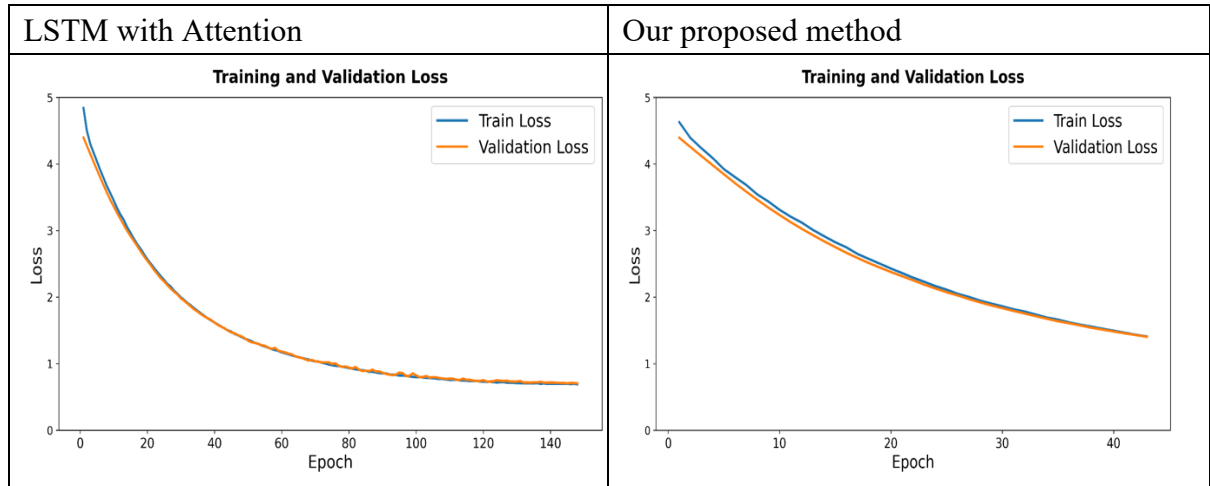

Figure A3. Training and Validation Loss Curves With Early Stopping Across Models.

## Calibration Analysis

Calibration curves before and after probability scaling are shown in Figures A3a and A3b. The dashed diagonal represents perfect calibration, where predicted probabilities equal observed event frequencies. Prior to calibration, several models exhibited systematic deviations from the ideal line, particularly in intermediate and higher probability ranges, indicating over- or underestimation of risk despite comparable discrimination performance. This highlights that similar AUC values do not guarantee reliable probability estimates.

After probability scaling, the calibration curves demonstrate improved alignment with the diagonal across most probability bins, with reduced overconfidence and greater stability in mid-risk regions. Discrimination performance remained largely unchanged, indicating that probability scaling improved risk reliability rather than ranking behavior. Because screening decisions are threshold-based, improved calibration enhances the validity of referral policies and reduces the risk of inappropriate over- or under-referral in clinical deployment.

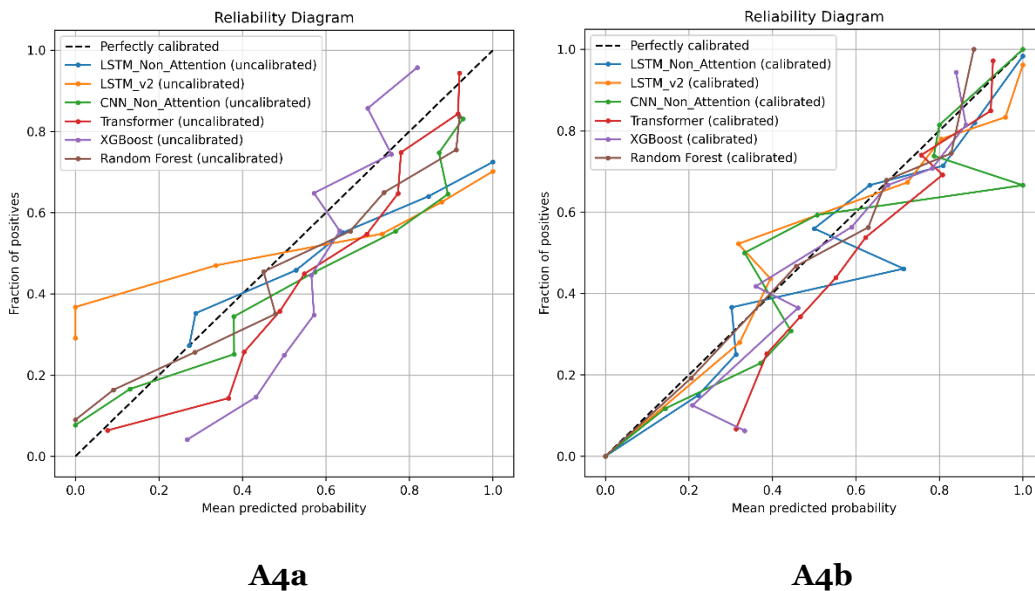

**Figure A4 Calibration Analysis**

## SHAP attention heatmap

To provide concrete evidence of interpretive behavior beyond global SHAP summaries, we visualize feature-level attribution patterns using an attention heatmap (Figure A4). The upper panel shows the aggregated risk trajectory, while the lower panel illustrates feature-wise contribution intensities across samples.

The guided attention mechanism concentrates weight on metabolically relevant variables in high-risk individuals, particularly within lipid and glycemic domains. Compared with baseline attention-free models, the attribution distribution is less diffuse and exhibits greater stability across adjacent samples. Notably, subgroup inspection of individuals with confirmed advanced pathology reveals consistent amplification of clinically coherent features rather than isolated spurious signals.

These findings suggest that guided attention refines representational focus toward clinically meaningful feature clusters, supporting interpretive stability rather than merely replicating standard SHAP importance rankings.

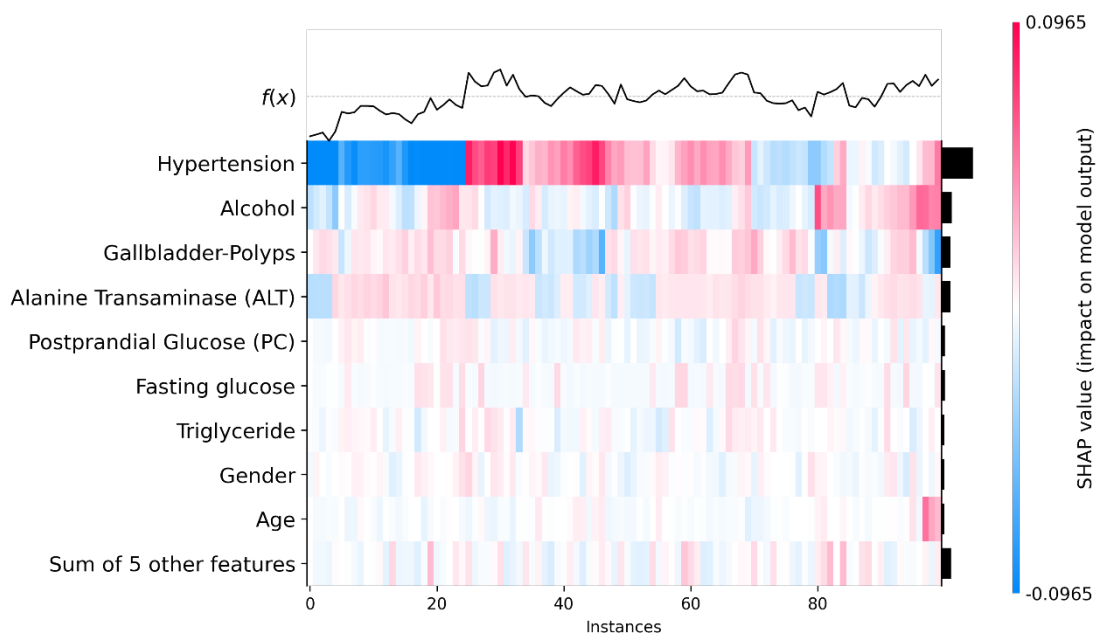

**Figure A5 Visualization of guided attention attribution patterns.**

## Patient-level Examples of AI-driven Risk Stratification

To further substantiate the interpretability of the proposed framework, we present two patient-level case studies demonstrating the alignment between guided attention patterns, SHAP-based local explanations, and independent clinician evaluation.

### ● Case 1: High-Risk Patient Prediction (Figure A6)

The first case involves a 59-year-old male patient classified as high risk, with a predicted probability of 0.55, exceeding the operational threshold (0.45). The guided attention heatmap shows concentrated weights on metabolically relevant features, particularly ALT, postprandial glucose, and age. The corresponding SHAP local explanation indicates that these variables contribute positively to the predicted risk estimate. Independent clinician review confirmed that the highlighted features are clinically coherent with established risk factors for adenomatous polyps. Based on expert feedback, the guide vector was refined (from v1.0 to v2.0), demonstrating the feasibility of iterative expert-in-the-loop calibration.

### A High-Risk Example for Clinical Co-Design of Explainable AI

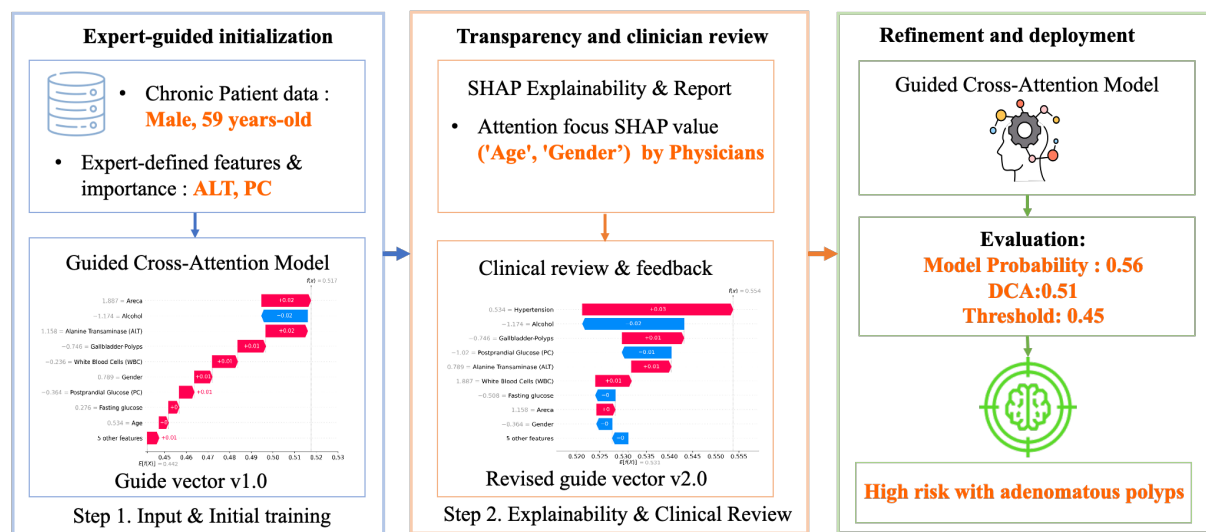

Figure A6 High-risk Example of an AI-driven risk stratification

### ● Case 2: Low-Risk Patient Prediction (Figure A7)

The second case involves a 35-year-old male patient classified as low risk, with a predicted probability below the operational threshold (0.45). The guided attention heatmap allocates greater weight to relatively normal metabolic indicators and younger age, reflecting protective patterns in the representation. The corresponding SHAP local explanation indicates that these factors contribute negatively to the risk estimate. Independent clinician review confirmed that the attribution pattern is consistent with standard clinical risk assessment principles.

## A Low-Risk Example for Clinical Co-Design of Explainable AI

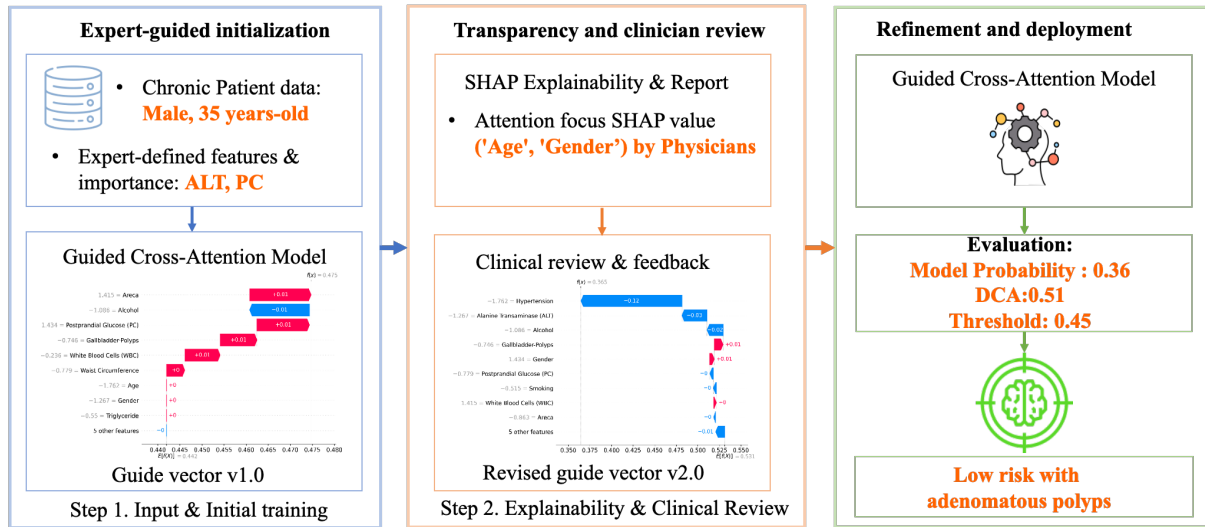

**Figure A7 Low-risk Example of an AI-driven risk stratification**
